1 **From tree tops to the ground: reversals to terrestrial habit in *Galeandra* orchids**  
2 **(Epidendroideae: Catasetinae)**

3  
4 **Authors:** Aline C. Martins<sup>1\*</sup>, Thuane Bochner<sup>2</sup>, Oscar A. Pérez-Escobar<sup>3</sup>, Guillaume  
5 Chomicki<sup>4,5</sup>, Silvana H. N. Monteiro<sup>6</sup> & Eric de Camargo Smidt<sup>1</sup>

6  
7 *1. Universidade Federal do Paraná, Setor de Ciências Biológicas, Centro Politécnico,*  
8 *Jardim da Américas, Curitiba - PR, 81531-980. C. P. 19031, Brazil.*

9 *2. Universidade Estadual de Campinas, Programa de Pós-Graduação em Biologia*  
10 *Vegetal, Campinas - SP, 13083-970. C.P. 6109, Brazil.*

11 *3. Identification and Naming Department, Royal Botanic Gardens Kew, Richmond,*  
12 *TW9 3AB, UK*

13 *4. Department of Plant Sciences, University of Oxford, South Park Road, Oxford OX1*  
14 *3RB, UK.*

15 *5. The Queen's college, High St, Oxford OX1 4AW, UK.*

16 *6. Universidade Estadual de Feira de Santana, Programa de Pós-Graduação em*  
17 *Botânica, Departamento de Ciências Biológicas, BR 116N km 3, 44031-460 Feira de*  
18 *Santana, BA, Brazil*

19

20 *\*Correspondence author: martinsalinec@gmail.com*

21

22

23

24

25 **Abstract**

26

27 The colonization of the epiphytic niche of tropical forest canopies played an important  
28 role in orchid's extraordinary diversification in the Neotropics. However, reversals to  
29 the terrestrial habit occurred sparsely in species of Epidendroideae. To better understand  
30 which factors might have been involved in reversals to terrestrial habits in the  
31 predominantly epiphytic Epidendroideae, we investigate *Galeandra* diversification in  
32 time and space. We hypothesized that the reversal to the terrestrial habitat is linked to  
33 the origin of open vegetation habitats in South America. We generated a time-calibrated  
34 phylogeny based on a matrix of 17 out of 20 species of *Galeandra* plus outgroups and  
35 seven DNA markers. We found that *Galeandra* originated towards end of the Miocene,  
36 about 10 Ma in Amazonia (including the Guiana Shield). The terrestrial clade originated  
37 synchronously with the rise of dry vegetation biomes, suggesting that aridification  
38 during the last 5 million years dramatically impacted the diversification of epiphytic  
39 lineages in the Neotropics. Habit is correlated with floral spur lengths and geographic  
40 range size. The longer spurs and narrower ranges are found in epiphytic species:  
41 probably adapted to a specialized pollination mode, associated to the long-tongued  
42 Euglossini bees, which also prefer forested habits. The terrestrial species presents  
43 variable floral spurs and wide distribution ranges, with evidence of self-pollination,  
44 suggesting the loss of specialized pollination system and concomitant range expansion.

45

46 **Key-words:** Orchids, Amazonia, ancestral area estimation, molecular dating, South  
47 American arid diagonal

48

49

50

51

## 52 **Introduction**

53

54

55           The colonization of the epiphytic niche in tropical forest canopies played an  
56 important role in the extraordinary diversification of orchids in the Neotropics (Benzing,  
57 1987; Gentry and Dodson, 1987; Givnish et al. 2015). Epiphyte microsite specialization  
58 together with biotic and abiotic variables including pollinator shifts, CAM  
59 photosynthesis, and presence in cordilleras have been proposed as the main drivers of  
60 orchid (Givnish et al., 2015; Pérez-Escobar et al., 2017a). The origin of epiphytism in  
61 land plants, including orchids, ferns, and leafy liverworts, followed the establishment of  
62 angiosperm-dominated canopies in the Cenozoic, possibly facilitated by climate change  
63 in the Paleocene/Eocene border (Chomicki et al., 2015a; Feldberg et al., 2014;  
64 Schuettpelez and Pryer, 2009)

64

65           Orchids are the most diverse group among epiphytes, accounting for 68%  
66 (19,000) of the 27,600 vascular epiphyte species (Gentry and Dodson, 1987; Zotz,  
67 2013). The evolution of epiphytism may have enhanced orchid diversification by  
68 allowing the conquest of new, largely unoccupied niches (Givnish et al., 2015), and  
69 often terrestrial orchid lineages are less diverse than the epiphytic (Gravendeel et al.,  
70 2004). The epiphytic habit offers the option of colonizing a larger heterogeneity of  
71 habitats: all the surface of branches, twigs and bark. However it requires adaptation to  
72 low substrate stability, limited nutrient and water supplies, and to colonize the  
73 patchiness biotope (Laube and Zotz, 2003). Thus, the canopy is difficult to colonize and  
74 only a plant with a complex suite of adaptations could survive as an epiphyte (Benzing,  
75 1987). Orchid adaptations to tree bark includes root with layer(s) of dead cells known as  
76 velamen, which enhance water and nutrient absorption and protects photosynthetic roots  
77 against UV-B radiation (Chomicki et al., 2015a), and thick succulent leaves and stems  
78 that store water (Freudenstein and Chase, 2015).

78

79           In Orchidaceae, epiphytism evolved at least four to seven times over the  
80 past 43 million yr and was possibly lost about seven to ten times (Chomicki et al.,  
81 2015). In the species-richest subfamily Epidendroideae the epiphytic habit  
82 predominates, yet the ancestral condition in orchid is clearly terrestrial (Chomicki et al.,  
83 2015; Freudenstein and Chase, 2015). Reversals to the terrestrial habit occurred many  
84 times in Epidendroideae, including the Collabieae (Xiang et al., 2014), *Dendrobium*  
85 (Xiang et al., 2016), most *Eulophia* (Martos et al., 2014), *Cyanaeorchis* (Batista et al.,  
2014), *Bletia+Hexalectris+Basiphylloea* (Sosa et al., 2016), many Pleurothallidinae

86 (Freudenstein and Chase, 2015), Malaxideae (Cameron, 2005) and *Galeandra*  
87 (Catasetinae). Although most reversals are associated to species-poor lineages, some are  
88 associated to speciose clades, potentially resulting from rapid diversification (Cameron,  
89 2005). The reversals to terrestrial habit are still poorly understood, but they might  
90 involve deep changes in morphological adaptations (Zhang et al., 2017) such as the loss  
91 or reduction of the velamen (Chomicki et al., 2015a) or occupation of new habitats  
92 (Sosa et al., 2016). Some of these adaptations are possibly linked to the presence of  
93 AGL12 gene, which are otherwise lost in epiphytic orchids (Zhang et al., 2017).

94 To better understand the factors that might have influenced the reversal to  
95 the terrestrial habits in a lineage within the predominantly epiphytic Epidendroideae, we  
96 investigate *Galeandra* diversification dynamics, climatic preferences, flower  
97 morphology and area of occurrence, using phylogenetic comparative methods.  
98 *Galeandra* is a widely distributed genus in the Neotropical region, ranging from  
99 southern Florida to northern Argentina, and five of its *ca* 20 species are terrestrial  
100 (Monteiro et al., 2010). *Galeandra* species occur across a wide range of biogeographic  
101 regions, mainly Amazonia, Cerrado savannahs and Atlantic Forest. Epiphytic  
102 *Galeandra* usually occupy more restricted distribution ranges, and occurs in forested  
103 areas (e.g. Amazonia), while the terrestrial species occupy open vegetation ecosystems  
104 (e.g. Cerrado, except *G. beyrichii* which inhabits in forest areas, especially altitude  
105 forests). The origin of the savannas worldwide, including the south American Cerrado,  
106 coincides with the gradual cooling that started at the Miocene climatic optimum  
107 (~15Ma) (Zachos et al., 2001), and they fully established about 5 Ma (Simon et al.,  
108 2009). Terrestrial *Galeandra* might have occupied these novel environments only  
109 recently. This raises the question whether terrestrial *Galeandra* are adapted to cooler  
110 and dryer habitats than epiphytic species occurring in rainforests. Further, it is not clear  
111 whether the origin of terrestrial *Galeandra*, and potential biome shifts (from forested to  
112 open savannas) occurred synchronously to the origin of the Cerrado.

113 Morphological differences of floral characters can be also observed in  
114 terrestrial and epiphytic *Galeandra*. Flowers of epiphytic *Galeandra* possess a long and  
115 filiform spur, while terrestrial taxa exhibit flowers with short and saclike spurs  
116 (Monteiro et al., 2010). Long floral spurs usually produce nectar or oil, and are accessed  
117 by an enlarged part of pollinator's body (e.g. tongues), but also legs (Steiner and  
118 Whitehead, 1990; Whittall and Hodges, 2007). Floral spur enlargement is usually linked  
119 to pollinators shifts, and it has been hypothesized as an adaptive response to predefined

120 pollinator morphology (Whittall and Hodges, 2007). The extent to which different floral  
121 morphologies are associated to distinct habitats is unknown, but habitat preference  
122 might have driven the evolution of particular pollination syndromes.

123 To investigate *Galeandra* diversification in time and space, and potential  
124 associated floral trait shifts, we used DNA sequences from Monteiro *et al.* (2010) plus  
125 newly generated sequence data of *Galeandra*, including a denser outgroup sampling.  
126 We aim to answer the following questions: (i) when and where did *Galeandra*  
127 originate? (ii) When did reversals to terrestrial habits occur, and where and under which  
128 habitat? (iii) Was habitat shift correlated with shifts in floral morphology, range size or  
129 climatic niche?

130

## 131 **Material and methods**

132

### 133 *Phylogenetics and dating analysis*

134 Our study builds upon the sampling of Monteiro *et al.* (2010) for *Galeandra*  
135 plus newly generated sequences for *G. leptoceras* and *G. macroleptera*, totalizing 17  
136 (out of 20) species in the genus. The outgroup sampling was also enlarged to better  
137 accommodate molecular dating calibrations (see below), comprising representatives of  
138 all Catasetinae genera, including *Cyrtopodium* and *Eulophia*, and newly generated  
139 sequences of *Catasetum*, *Clowesia*, *Cyanaeorchis* and *Cycnoches*. Voucher information  
140 and GenBank numbers are presented in Table S1. DNA extraction, PCR conditions and  
141 sequencing methods are described in Monteiro *et al.* (2010).

142 The final matrix consisted of 31 taxa and 6014 nucleotides for five plastid  
143 (*ycf1*, *psbA-trnH*, *rpoB-trnC* and *trnS-trnG*), and two nuclear (*xdh*, ITS and ETS)  
144 markers. Alignments were performed in MAFFT v. 7 (Katoh and Standley, 2013), with  
145 default parameters except for the plastid markers which were aligned using the G-INS-i  
146 strategy following recommendations for sequences with global homology. ITS and ETS  
147 which were aligned using the Q-INS-i strategy, which considers the secondary RNA  
148 structure (Katoh and Standley, 2013). The alignments were manually edited in Geneious  
149 6.0 (Biomatters, 2013) to correct obvious alignment errors. In the absence of supported  
150 (Maximum Likelihood Bootstrap Support [MLBS] > 75%) phylogenetic incongruence  
151 between plastid and nuclear markers, the matrices were concatenated, also in Geneious.

152 Prior to molecular dating analysis, we performed Maximum Likelihood  
153 searches and compared our results with a previously published phylogeny of *Galeandra*

154 (Monteiro et al., 2010) and Catasetinae (Pérez-Escobar et al., 2017a). Maximum  
155 likelihood tree searches and bootstrapping of the combined dataset using 1000 replicates  
156 were performed in RAxML v. 8 (Stamatakis, 2006) using the graphical user interface  
157 raxmlGUI 1.3.1 (Silvestro and Michalak, 2012), under the GTR + G model of DNA  
158 evolution.

159 We subsequently time-calibrated our phylogeny, relying on the same matrix  
160 of four plastid and three nuclear markers, comprising 31 taxa and 6014 nucleotides,  
161 using a Bayesian relaxed-clock approach implemented in BEAST 1.8.3 (Drummond et  
162 al., 2012). Absolute divergence times were estimated under the GTR+ G substitution  
163 model, and Yule tree speciation model. The Markov Chain Monte Carlo (MCMC) chain  
164 was run for 50 million generations, sampling every 10000 generations. Orchids appear  
165 to have diverged from the common ancestor of all other members of Asparagales in the  
166 Cretaceous around 110 Ma and the crown group ca. 90 Ma, and upper Epidendroids  
167 diverged in the Paleogene, around 50 Ma (Chomicki et al., 2015). There are four  
168 unambiguous Orchidaceae macrofossils, but none of them is assigned to taxa closely  
169 related to Catasetinae (Ramírez et al., 2007). Therefore, the phylogeny of *Galeandra*  
170 was secondarily calibrated based on the age obtained by Chomicki *et al.* (2015) for  
171 Catasetinae's crown group of 19.8 (95% Highest Posterior Density Interval [95% HPD]:  
172 14.68-25.73 Ma). These ages are perfectly congruent with (Givnish et al., 2015). A  
173 normal distribution prior was applied on the Most Recent Common Ancestor (MRCA)  
174 of Catasetinae, with Mean=19.8 and Stdev=3 (95% HPD 14.87 – 24.73). A maximum  
175 clade credibility tree was summarized in TreeAnnotator v. 1.8.0 (part of BEAST  
176 package) with a 25% burn-in, when effective sample size (ESS) for all parameters were  
177 superior to 200, as assessed in Tracer 1.5. Trees were visualized and initially edited in  
178 FigTree 1.4.0 (Rambaut, 2009).

179

#### 180 *Ancestral area estimation*

181 Species ranges were coded from the literature and from herbarium specimens  
182 (ALCB, AMES, AMO, B, BM, BR, F, INPA, K, K-L, NY, P, PORT, RB, S, US and W  
183 - abbreviations according to Index Herbariorum (<http://sweetgum.nybg.org/science/ih/>)).  
184 Biogeographical areas were derived from literature, as well as from distribution patterns  
185 observed in other plant lineages (e.g. Rubiaceae: Antonelli *et al.*, 2009; Bromeliaceae:  
186 Givnish *et al.*, 2011; *Cycnoches*: (Pérez-Escobar et al., 2017c). We coded the

187 geographical range of *Galeandra* as: A = Central America, B = Chocó, C = Amazonia,  
188 D = Guiana Shield, E = Dry Diagonal and F = Atlantic Forest; Fig. S1 shows coded  
189 biogeographical regions. Specimens without reliable geographic locality or with  
190 dubious identification were excluded.

191 For Ancestral Area Estimation (AAE), we relied on the R package  
192 BioGeoBEARS (Matzke, 2013), which evaluates several biogeographic models  
193 altogether to test for the contribution of evolutionary processes (i.e., range expansion,  
194 range extinctions, vicariance, founder-event speciation, within-area speciation) to  
195 explain the distribution of modern species. We analyzed independently the models DEC  
196 (Ree and Smith, 2008), a modified version of DIVA (Ronquist, 1997), named DIVA-  
197 like, and a modified version of BayArea (Landis et al., 2013) or BayArea-like, adding  
198 separately the founder-speciation parameter  $j$ . We assessed the overall fitness of the  
199 models conducting likelihood ratio tests based on AICc scores. *Galeandra macroplectra*  
200 was excluded from biogeographic analysis due to negative branch lengths.

201

#### 202 *Range size*

203 To determine if range size is associated to plant habit, we evaluate  
204 distribution ranges of all *Galeandra* species sampled in our phylogeny. Distribution  
205 ranges were obtained by literature and herbarium specimens' examination, as stated in  
206 the previous section. We calculated the Extent of Occurrence (EOO) and Area of  
207 Occupancy (AOO) for each species using GeoCAT (Bachman et al. 2011,  
208 <http://geocat.kew.org>). EOO represents the defined area contained within the shortest  
209 imaginary boundary drawn to encompass all the known sites of occurrence of a taxon,  
210 often measured by a minimum convex polygon; AOO represents the area within its  
211 "extent of occurrence" which is occupied by a taxon, usually calculated by the sum of  
212 all square grids in which the species were registered (IUCN, 2013). Because EOO  
213 extrapolates the area of occurrence of a species, we choose AOO for our analysis. The  
214 Table S5 shows the values of AOO measured and used in the analysis.

215

#### 216 *Ancestral state estimation of spur length*

217 Fifteen out of the 20 know species of *Galeandra* (17 included in our DNA  
218 sequence matrix) were included in the analysis. We obtained minimum, mean and

219 maximum values of spur length and width (Figure S1) from herbarium specimens and  
220 literature (Monteiro et al., 2010). Whenever possible, we gathered measures from at  
221 least five individuals per species. Table S6 provides a list with all measurements of  
222 species studied and herbarium specimens sourced. Maximum Likelihood Ancestral  
223 State Estimation (ASE) of mean spur length values was conducted using an ultrametric  
224 tree derived from dating analysis (see above) and the function *contMap* of the R  
225 package ‘phytools’ (Revell, 2012). In addition, to investigate the evolution of spur  
226 length through time, we produced a traitgram (Evans et al., 2009) by plotting our  
227 ultrametric tree as function of time (from root age to present) and phenotype (i.e. spur  
228 length) using the function *phenogram* of the package ‘phytools’. Uncertainties of the  
229 ASEs were explored by plotting the probability density of the ancestral estimation in the  
230 traitgram.

231

### 232 *Correlation tests*

233 We further test for the correlated evolution between plant habit (0=terrestrial,  
234 1=epiphytic), and spur length under a quantitative genetic threshold model (Wright,  
235 1934; Felsenstein, 2012). This model is applied to discrete variables (e.g. viviparity:  
236 Lambert & Wiens, 2013; feeding mode in fishes: Revell, 2013), whose probability of  
237 state change is associated to an underlying continuous variable. Correlation analysis  
238 was implemented on a Bayesian framework for 1,000,000 generations, with a sampling  
239 fraction of 100 generations using the function *threshBayes* in the R package ‘Phytools’  
240 (Revell, 2012).

241

### 242 *Phylomorphospace*

243

244 To visualize relationship between the spur length, range size and plant habit,  
245 while simultaneously accounting for phylogenetic relationship, we generated a  
246 morphospace using spur length and range size as continuous variables. To this end, we  
247 relied on the function *phylomorphospace* of the R package phytools (Revell, 2012).

248

### 249 *Climatic variables*

250 We mapped 639 georeferenced collection records obtained from floras, GBIF  
251 database and herbarium specimens (mean 37, maximum number of record per species  
252 157), and they represent the known distribution of *Galeandra* and extant species



253 included in our taxon sampling. To query GBIF database, we relied on the function *occ*  
254 of the R package SPOCC (Chamberlain, 2016). We further extracted corresponding  
255 values of elevation and 19 climatic variables (30 seconds resolution) reflecting  
256 temperature and precipitation regimes from the WorldClim database (available at:  
257 <http://www.worldclim.org/current>; Hijmans et al., 2005), using the function *extract* of  
258 the R package RASTER (Hijmans, 2016).

259

#### 260 *Non-metric dimensional scaling analyses*

261 To avoid spurious results arising from inclusion of correlated variable, we  
262 determined the Pearson's correlation coefficients between the bioclim variables and  
263 altitude and then included only variables with a Pearson's correlation coefficient <0.5,  
264 taking a single variable in correlated clusters. This way, we selected the bioclimatic  
265 variables 1 (Annual mean temperature), 2 (Mean diurnal temperature range), 12  
266 (Annual precipitation), 13 (Precipitation of wettest week), 14 (Precipitation of driest  
267 week), and 18 (Precipitation of warmest quarter). We analysed these variables using  
268 the R-package VEGAN (Oksanen et al., 2007) to perform non-metric dimensional  
269 scaling analyses (NMDS) using the dataset of 657 georeferenced herbarium specimens.  
270 To ask whether (i) epiphytic versus terrestrial *Galeandra*, and (ii) short-spurred versus  
271 long-spurred *Galeandra* had different niches, we computed the 95% confidence  
272 intervals for each group. Overlap between confidence intervals suggests the absence of  
273 significant niche differentiation among groups.

274

## 275 **Results**

276

### 277 *Phylogeny of Galeandra and time of origin of terrestrial and epiphytic clades*

278

279 Our matrix of 31 taxa and 6014 nucleotides for four plastid and three  
280 nuclear genes yielded a tree with the same relationships found by Monteiro *et al.*,  
281 (2010) analysis for *Galeandra* species (Fig. S1). Our enlarged outgroup sampling  
282 scheme represents the genus level relationships in the tribe Catasetinae with high  
283 support for the core Catasetinae *sensu* (Dressler, 1983). In our phylogeny, *Galeandra* is  
284 sister group to the core Catasetinae (*Catasetum*, *Clowesia*, *Cycnoches*, *Mormodes*,  
285 *Dressleria*) plus *Grobya*+*Cyanaeorchis* (but larger datasets indicate

286 *Grobya+Cynaeorchis* as sister to *Galeandra*+coreCatasetinae (Batista et al., 2014;  
287 Pérez-Escobar et al., 2017a, 2017b, 2016, 2015). *Galeandra devoniana* was recovered  
288 as sister to the remaining *Galeandra* species, which is split into a terrestrial and a  
289 epiphytic clades, both well supported (ML bootstrap support = 100). Absolute age  
290 estimation (Fig. 1, Fig. S2) yielded a root age (i.e. the split between *Eulophia* and  
291 *Cyrtopodium*+Catasetina) of 29 Ma (95% HPD: 17-44). The MRCA of *Galeandra* plus  
292 the core Catasetinae age is 17 Ma (95% HPD = 11-23), and the crown group of  
293 *Galeandra* originated in the Miocene ca. 9 Ma (95% HPD: 5-13). The terrestrial clade  
294 and epiphytic clade diverged from each other in the late Miocene about 7 Ma (95%  
295 HPD: 4-11) (Fig 1). The epiphyte clade included species from Amazonia, Mexico,  
296 Venezuela, and Guianas, while the terrestrial clade encompassed species occurring in  
297 the Dry Diagonal of South America, e.g. Cerrado, and open environments in Colombia  
298 and Venezuela. The terrestrial and epiphytic clades crown ages are approximately 4 Ma  
299 (95% HPD: 2-6). Most of the adaptive radiation in *Galeandra* occurred in the Pliocene-  
300 Pleistocene border (>3 Ma). The Mexican clade of epiphytes diverged 2 (1-5) Ma.

301

302 *Geographic origin of terrestrial habit and biogeographic history of Galeandra*

303

304 BioGeoBEARS multi-model approach yielded DEC+j as the best fitting  
305 model for the *Galeandra* phylogeny (Tab. S3 provides AICc values of all  
306 biogeographical models tested). The MRCA of *Galeandra* is inferred to have lived in an  
307 area encompassing Amazonia and Guiana Shield (Fig. 1). The ancestral area for the  
308 terrestrial clade, which has at least one widespread species, *G. beyrichii*, included  
309 Amazonia, Dry Diagonal and Atlantic Forest. On the other hand, the MRCA of the  
310 epiphytic clade is restricted to Northern South America, i.e. Amazonia and Guiana  
311 Shield. Among the epiphytic *Galeandra*, only *G. blanchetii* occurs in (and is restricted  
312 to) open vegetation of the Dry Diagonal.

313

314 *Terrestrial habit origin and correlates with spur length evolution, range size and*  
315 *climatic niche*

316 Figure 2 shows the continuous trait map of floral spur evolution in *Galeandra*,  
317 highlighting the marked differences in spur length between the terrestrial and the  
318 epiphytic clades. Short spur length was the ancestral condition in *Galeandra* flowers

319 (Fig. 2A), being the shortest in *G. devoniana*. The terrestrial clade shows an  
320 intermediate pattern of floral spur length. *Galeandra beyrichi* is the species that presents  
321 the shortest spur in this clade. The MRCA of the epiphytic clade had longer floral spurs,  
322 and *G. magnicolumna* is the species with the largest floral spurs. The traitgram in Fig.  
323 2B (and density traitgram in Fig. S4) shows the floral spur length mapping in time,  
324 highlighting the different rate of evolution of the considered states (short and long spur).  
325 We observed a shift in morphological rates at the base of the long-spurred clade of  
326 *Galeandra* (epiphytic species) (Fig. 2B). The terrestrial and short-spurred clade presents  
327 a higher rate of morphological change.

328           The figure 3 presents the results of analysis of phylomorphospace  
329 correlating floral spur length, range size and habit. Here, epiphytic species formed a  
330 cluster of lineages with narrow range sizes (up to 200 km<sup>2</sup>) and longer floral spur (2-2.5  
331 cm). Only one species, *Galeandra devoniana*, does not integrate this group, but presents  
332 an isolated pattern of correlation between a short spur length and moderately small  
333 range size. The terrestrial species, on the other hand, do not form a cohesive group.  
334 They present no pattern of range size or floral spur length.

335           The NDMS analysis found only the bioclimatic variables 1, 2, 12, 13, 14  
336 and 18 to be non-correlated (Fig. S5). We detected no niche differentiation between  
337 terrestrial and epiphytic *Galeandra* neither between long and short-spurred *Galeandra*  
338 (Fig. S6 and Fig. S7).

339

## 340 **Discussion**

341

### 342 *Miocene origin of Galeandra in Amazonia*

343

344           *Galeandra* arose towards the Late Miocene, about 10 Ma, close to the climatic  
345 optimum when several plant clades in the Neotropical Region originated (Antonelli et  
346 al., 2009; Gustafsson et al., 2010; Hoorn et al., 2010; Pérez-Escobar et al., 2017c). At  
347 that time, the Guiana and the Brazilian Shields became large islands. A period of  
348 intensified mountain uplift started at the same time in Northern, promoting the origin  
349 and extinction of mega wetlands in Amazonia, and shifting the drainage of the Amazon  
350 Basin eastwards (Antonelli et al., 2009; Hoorn et al., 2010).

351           Our ancestral area estimation analyses suggest the MRCA of *Galeandra*  
352 inhabited in Amazonia (including the Guiana Shield) towards the Late Miocene, at a  
353 period where the region occupied a very large part of South America, extending as far

354 as South Parana region (Hoorn et al., 2010). Early diversification of *Galeandra*  
355 occurred in forested areas, while diversification of terrestrial lineages in *Galeandra*  
356 might have taken place in both forested areas and the Dry Diagonal, influenced by the  
357 rise of dry vegetation biomes. The extend of tropical forests in South America changed  
358 with the Andean uplift and its consequences on regional climate, as well as with global  
359 climate changes, which favored the establishment of the Dry vegetation areas in South  
360 America (Antonelli et al., 2009; Posadas and Ortiz-Jaureguizar, 2016).

361 The expansion of open vegetation biomes started by the end of Miocene,  
362 resulting in the formation of large biomes in the Pliocene such as the Cerrado (Simon et  
363 al., 2009), and the establishment of complex system of dry vegetation biomes. Such dry  
364 areas are mostly arranged in the dry diagonal of South America, but with accessory  
365 patches occurring in all Neotropical Region (Werneck, 2011). In the case of Cerrado,  
366 the boundaries appear to have been porous to the migration and recruitment of lineages  
367 from a range of wet and dry forest vegetation types. Adjacent biomes including the  
368 Amazonia and Atlantic wet forests, tropical and subtropical dry thorn scrub (Caatinga  
369 and Chaco), subtropical grasslands, and wetlands have all contributed to the recruitment  
370 of Cerrado lineages. The migration of lineages from surrounding ecosystems was  
371 facilitated by its nested distribution and enhanced the striking Cerrado's species  
372 richness (Simon et al., 2009). The MRCA of the terrestrial *Galeandra* (4 Ma: HDP 2-6)  
373 could have originated on the tropical forests or on the recently formed open vegetation  
374 areas. In spite of beginning the diversification about 10 Ma, most plant lineages  
375 characteristic of Cerrado diversified only recently, 4 Ma or less (Simon et al., 2009).  
376 Therefore, the diversification of both clades (epiphytes and terrestrial) is congruent with  
377 this time of drastic transformation in the distribution of forest and open vegetation.  
378 However, only species with terrestrial habitat were able to occupy the recently formed  
379 biomes, at the same time expanding their distribution. Today, terrestrial *Galeandra*  
380 occupy several different open vegetation areas, not only the core Cerrado vegetation,  
381 but also costal dunes in Brazil, savannas of Venezuela, islands of savanna in Amazon  
382 and even shaded humid forests, in the case of *G. beyrichii*, which probably possess  
383 secondary adaptation to forests (Monteiro et al., 2010).

384 Tropical broadleaf forests provide a plethora of niches for epiphytic plants, and  
385 both origins of epiphytism and these forests are profoundly connected (Schuettpeitz and  
386 Pryer, 2009). Therefore, it is not surprising that the early diversification of the epiphytic  
387 clade of *Galeandra* occurred on the forested areas (Amazonia and Guiana Shield), until

388 the Pliocene. In the Quaternary, the Dry Diagonal area became important for this group  
389 too. These epiphytes do not occupy the open vegetation, but the gallery forests, which  
390 are riverine forests forming narrow strips along the river valleys in the Cerrado biome  
391 (Oliveira-Filho and Ratter, 1995). Many plants and animal species from Amazonian or  
392 Atlantic Forest domains crosses the Cerrado through those gallery forests, some  
393 expanding their distribution within Cerrado (Costa, 2003) and several authors have  
394 pointed to affinities between the woody flora of the Cerrado and the Atlantic and  
395 Amazon rain forests (Gottsberger and Silberbauer-Gottsberger, 2006; Oliveira-Filho  
396 and Fontes, 2000). In the case of *Galeandra*, the gallery forests are occupied by  
397 Amazonian species, reinforcing the relatedness of Amazon and gallery forests (Oliveira-  
398 Filho and Ratter, 1995; Pennington et al., 2006).

399 In the epiphytic clade, a dispersal to Central America occurred about 3 Ma (1-5),  
400 possibly following the final closure of the Isthmus of Panama, finally formed only 2.8  
401 Ma ( O’Dea et al., 2016, but see Jaramillo et al., 2017). The union of both land masses  
402 started an exchange of fauna and flora (called GABI or Great American Biotic  
403 Interchange – see (Cody et al., 2010)), but for plants there are several evidences of  
404 previous dispersals between South and Central/North America (Bacon et al., 2013;  
405 Olmstead, 2013). *Galeandra* species might have dispersed overseas as it happened for  
406 other orchid species (Renner, 2004), by land, facilitated by the recently formed  
407 connection of the Isthmus of Panama or by long distance dispersal across the Andes.

408  
409 *Habit, floral spur length and range size*

410  
411 Changes from epiphytic to terrestrial habitat might have played a role in  
412 *Galeandra* ecological requirements far beyond light and water levels, and may have  
413 also affected interactions with bee pollinators. Epiphytic species presents longer floral  
414 spurs, which can be associated to the evolution with long tongued pollinators, such as  
415 Euglossini bees, the primary pollinators of Catasetinae orchids (Dressler, 1982; Ramírez  
416 et al., 2011).

417 Pollination observations in *Galeandra* flowers are scarce, limited to some  
418 punctual observations of pollinaria attached to male orchid bee’s body (i.e. fragrance  
419 seeking) (Pearson and Dressler, 1985; Romero-Gonzalez and Warford, 1995) or  
420 “Anthophoridae” bees (possibly *Xylocopa*) (nectar or pollen seeking) (Chase and Hills,  
421 1992; Romero-Gonzalez and Warford, 1995). However, how *Galeandra* attract their  
422 pollinators remains a mystery. Floral spurs in epiphytic *Galeandra* apparently lack any

423 nutritional reward to pollinators, indicating a possible deceptive attraction, very  
424 common in orchids (Ackerman, 1986; Jersáková et al., 2006; Nilsson, 1998; Pansarin  
425 and Maciel, 2017). Fragrance-seeking bees can find rewards at least in *G. devoniana*, *G.*  
426 *magnicolumna* and *G. stangeana* (SHNM pers. obs.) Observations on cultivated  
427 epiphytic species of *Galeandra* (*G. cristata*, *G. santarenensis*, *G. stangeana*) shows that  
428 they are self-compatible, but not able to self-pollinate, therefore requiring cross-  
429 pollination (SHNM pers. obs.).

430 Terrestrial species have a variable spur length, but in general shorter than  
431 epiphytic. The occupation of terrestrial habits might have led to shift in pollinator's  
432 requirements or independence of pollination by animals. Euglossini bees are diverse and  
433 widespread in forested habitats, mostly on cloud or lowland forests (Cameron, 2004;  
434 Dressler, 1982), presenting low diversity in open vegetation habitats like Cerrado (Faria  
435 and Silveira, 2011). The orchid bee fauna occurring in open vegetation biomes are  
436 frequently associated to patches of forests occurring along the rivers and there is no  
437 species endemic to these biomes, but shared with adjacent large forested biomes like  
438 Amazon or Atlantic Forest (Faria and Silveira, 2011). Because flowers of terrestrial  
439 *Galeandra* appear to be rewardless, pollination by deceit might also occur in this clade.  
440 Also, terrestrial *G. beyrichii* and *G. montana* present very wide distribution ranges (i.e.  
441 so and so) and high levels of fruit production in herbaria material, suggesting self-  
442 pollination is common among these taxa. However, evidences for self-compatibility, but  
443 not spontaneous self-pollination, were observed on cultivated plants of the terrestrial *G.*  
444 *styllomisantha*.

445 The distribution of orchids might be limited by the joint effect of habitat  
446 availability and pollination limitation (Gravendeel et al., 2004; McCormick and  
447 Jacquemyn, 2014). Epiphytic *Galeandra* usually presents a narrow geographic range  
448 size compared to the terrestrial species. It might be linked to the habit occupied *per se*  
449 or to different mechanisms of pollination (dependent of pollinators or not). It could also  
450 reflect a higher dependency on particular pollinators. Smaller range sizes are typically  
451 found in more specialized mutualisms, as compared to their generalist relatives  
452 (Chomicki et al., 2015b). Some evidences of epiphytic orchids with a restricted  
453 distribution when compared to the geographic range size of terrestrial species were  
454 indicated by Zhang et al. (2015) which related this difference to environmental  
455 variables. The low availability of substrates in epiphytic habitats results in restricted and  
456 irregular moisture supplies, making water shortages a limiting factor for the

457 establishment and growth of epiphytes (Benzing, 1987; Laube and Zotz, 2003; Zhang et  
458 al., 2015). On the other hand, the terrestrial species do not form a cohesive group  
459 regarding range size or floral spur length.

460 Slow morphological change in interaction-related traits is a feature of highly  
461 specialized mutualisms, and suggests stabilizing selection (Chomicki and Renner, 2017;  
462 Davis et al., 2014). Our morphological analysis shows terrestrial *Galeandra* has a high  
463 spur morphorate (Fig. 2), potentially resulting from disruption of bee pollination. As  
464 mentioned earlier, long-spurred taxa are likely to have more specialized pollination  
465 syndromes than short-spurred ones, which are deemed to be more generalist.

466

## 467 **Conclusions**

468

469 *Galeandra*, a primarily epiphytic orchid lineage, arose in Miocene about 10 Ma  
470 in South America, and most probably the epiphytic clade diversified in Amazon.  
471 Terrestrial habit in *Galeandra* arose synchronously with the expansion of open  
472 vegetation savannas around 5 Ma. Surprisingly the change from epiphytic to terrestrial  
473 habitat does not involve significant changes in climatic niche, perhaps explaining the  
474 frequency of such transition in Epidendroid orchids. However, terrestrial species tend to  
475 occupy larger geographical ranges probably facilitated by their ecological requirements,  
476 but also pollination mode. Floral morphology suggests a shift from pollination by long  
477 tongued bees to pollination by morphologically distinct bees or independence from  
478 animal pollination.

479

## 480 **Acknowledgements**

481

482 We are grateful to Adarilda Petini-Benelli, Günter Gerlach, Mauricio Mercadante,  
483 Rafael D. Bortoloti and Vinicius Dittrich for *Galeandra* photos. To CAPES for the  
484 postdoctoral fellowship to ACM and CNPq for the Bolsa de Produtividade em  
485 Pesquisa (Nível 2 – Proc. 311001/2014-9) awarded to ECS. TB received financial  
486 support from CAPES. GC is supported by a Glasstone research fellowship and a Junior  
487 Research Fellowship at the Queen’s college, both at the University of Oxford, UK.  
488 OAPE is supported by the Lady Sainsbury Orchid Fellowship at Royal Botanic  
489 Gardens, Kew.

490

491

492

493 **References**

494

- 495 Ackerman, J.D., 1986. Mechanisms and evolution of food-deceptive pollination system  
496 in orchids. *Lindleyana* 1, 108–113. doi:10.1017/S1464793105006986
- 497 Antonelli, A., Nylander, J.A.A., Persson, C., Sanmartín, I., 2009. Tracing the impact of  
498 the Andean uplift on Neotropical plant evolution. *Proc. Natl. Acad. Sci. U. S. A.*  
499 106, 9749–54. doi:10.1073/pnas.0811421106
- 500 Bachman, S., Moat, J., Hill, A.W., de laTorre, J., Scott, B., 2011. Supporting red list  
501 threat assessments with GeoCAT: Geospatial conservation assessment tool.  
502 *Zookeys* 150, 117–126. doi:10.3897/zookeys.150.2109
- 503 Bacon, C.D., Mora, A., Wagner, W.L., Jaramillo, C.A., 2013. Testing geological  
504 models of evolution of the Isthmus of Panama in a phylogenetic framework. *Bot. J.*  
505 *Linn. Soc.* 171, 287–300. doi:10.1111/j.1095-8339.2012.01281.x
- 506 Batista, J.A.N., Mota, A.C.M., Proite, K., Bianchetti, L. de B., Romero-González, G.A.,  
507 Espinoza, H.M.H., Salazar, G.A., 2014. Molecular phylogenetics of Neotropical  
508 *Cyanaeorchis* (Cymbidieae, Epidendroideae, Orchidaceae): Geographical rather  
509 than morphological similarities plus a new specie. *Phytotaxa* 156, 251–272.  
510 doi:10.11646/phytotaxa.156.5.1
- 511 Benzing, D.H., 1987. Vascular epiphytism: taxonomic participation and adaptive  
512 diversity. *Ann. Missouri Bot. Gard.* 74, 183–204.
- 513 Biomatters, 2013. Geneious 6.1.6.
- 514 Cameron, K.M., 2005. Leave it to the leaves: A molecular phylogenetic study of  
515 Malaxideae (Epidendroideae, Orchidaceae). *Am. J. Bot.* 92, 1025–1032.  
516 doi:10.3732/ajb.92.6.1025
- 517 Cameron, S.A., 2004. Phylogeny and biology of Neotropical orchid bees (Euglossini).  
518 *Annu. Rev. Entomol.* 49, 377–404. doi:10.1146/annurev.physchem.52.1.71
- 519 Chamberlain, S., 2016. spocc: Interface to Species Occurrence Data Sources.
- 520 Chase, M.W., Hills, H.G., 1992. Orchid Phylogeny, flower sexuality, and fragrance-  
521 seeking. *Bioscience* 42, 43–49.
- 522 Chomicki, G., Bidel, L.P.R., Ming, F., Coiro, M., Zhang, X., Wang, Y., Baissac, Y.,  
523 Jay-Allemand, C., Renner, S.S., 2015a. The velamen protects photosynthetic  
524 orchid roots against UV-B damage, and a large dated phylogeny implies multiple  
525 gains and losses of this function during the Cenozoic. *New Phytol.* 205, 1330–  
526 1341.
- 527 Chomicki, G., Renner, S.S., 2017. Partner abundance controls mutualism stability and  
528 the pace of morphological change over geologic time. *Proc. Natl. Acad. Sci.* 114,  
529 3951–3956. doi:10.1073/pnas.1616837114
- 530 Chomicki, G., Ward, P.S., Renner, S.S., 2015b. Macroevolutionary assembly of  
531 ant/plant symbioses: *Pseudomyrmex* ants and their ant-housing plants in the  
532 Neotropics. *Proc. R. Soc. B Biol. Sci.* 282.
- 533 Cody, S., Richardson, J.E., Rull, V., Ellis, C., Pennington, R.T., 2010. The great  
534 American biotic interchange revisited. *Ecography* 33, 326–332.  
535 doi:10.1111/j.1600-0587.2010.06327.x
- 536 Costa, L.P., 2003. The historical bridge between the Amazon and the Atlantic forest of  
537 Brazil a study of molecular phylogeography with small mammals. *J. Biogeogr.* 30,  
538 71–86. doi:10.1046/j.1365-2699.2003.00792.x
- 539 Davis, C.C., Schaefer, H., Xi, Z., Baum, D.A., Donoghue, M.J., Harmon, L.J., 2014.  
540 Long-term morphological stasis maintained by a plant-pollinator mutualism. *Proc.*  
541 *Natl. Acad. Sci. U. S. A.* 111, 5914–9. doi:10.1073/pnas.1403157111



- 542 Dressler, R.L., 1983. Classification of the Orchidaceae and their probable origin.  
543 *Telopea* 2, 413–424.
- 544 Dressler, R.L., 1982. Biology of the orchid bees (Euglossini). *Annu. Rev. Ecol. Syst.*  
545 13, 373–394.
- 546 Drummond, A.J., Suchard, M.A., Xie, D., Rambaut, A., 2012. Bayesian phylogenetics  
547 with BEAUti and the BEAST 1.7. *Mol. Biol. Evol.* 29, 1969–73.  
548 doi:10.1093/molbev/mss075
- 549 Evans, M.E.K., Smith, S.A., Flynn, R.S., Donoghue, M.J., 2009. Climate, niche  
550 evolution, and diversification of the “Bird Cage” evening primroses (Oenothera,  
551 Sections *Anogra* and *Kleinia*). *Am. Nat.* 173, 225–240. doi:10.1086/595757
- 552 Faria, L.R.R., Silveira, F.A., 2011. The orchid bee fauna (Hymenoptera, Apidae) of a  
553 core area of the Cerrado, Brazil: The role of riparian forests as corridors for forest-  
554 associated bees. *Biota Neotrop.* 11, 87–94.
- 555 Feldberg, K., Schneider, H., Stadler, T., Schäfer-Verwimp, A., Schmidt, A.R.,  
556 Heinrichs, J., 2014. Epiphytic leafy liverworts diversified in angiosperm-  
557 dominated forests. *Sci. Rep.* 4, 5974.
- 558 Felsenstein, J., 2012. A Comparative method for both discrete and continuous  
559 characters using the threshold model. *Am. Nat.* 179, 145–156.
- 560 Freudenstein, J. V., Chase, M.W., 2015. Phylogenetic relationships in Epidendroideae  
561 (Orchidaceae), one of the great flowering plant radiations: Progressive  
562 specialization and diversification. *Ann. Bot.* 115, 665–681.  
563 doi:10.1093/aob/mcu253
- 564 Gentry, A.H., Dodson, C.H., 1987. Diversity and biogeography of Neotropical vascular  
565 epiphytes. *Ann. Missouri Bot. Gard.* 74, 205–233.
- 566 Givnish, T.J., Barfuss, M.H.J., van Ee, B., Riina, R., Schulte, K., Horres, R., Gonsiska,  
567 P.A., Jabaily, R.S., Crayn, D.M., Smith, J.A.C., Winter, K., Brown, G.K., Evans,  
568 T.M., Holst, B.K., Luther, H., Till, W., Zizka, G., Berry, P.E., Sytsma, K.J., 2011.  
569 Phylogeny, adaptive radiation, and historical biogeography in Bromeliaceae:  
570 Insights from an eight-locus plastid phylogeny. *Am. J. Bot.* 98, 872–895.  
571 doi:10.3732/ajb.1000059
- 572 Givnish, T.J., Spalink, D., Ames, M., Lyon, S.P., JUnter, S.J., Zuluaga, A., Iles, W.J.D.,  
573 Clements, M.A., Arroyo, M.T.K., Leebens-Mack, J., Endara, L., Kriebel, R.,  
574 Neubig, K.M., Whitten, W.M., Williams, N.H., Cameron, K.M., 2015. Orchid  
575 phylogenomics and multiple drivers of their extraordinary diversification. *Proc. R.*  
576 *Soc. B* 282.
- 577 Gottsberger, G., Silberbauer-Gottsberger, I., 2006. Life in the Cerrado, a south  
578 American tropical seasonal ecosystem. origin, structure, dynamics and plant use  
579 (vol. 1). Reta Verlag, Ulm.
- 580 Gravendeel, B., Smithson, A., Slik, F.J.W., Schuiteman, A., 2004. Epiphytism and  
581 pollinator specialization: drivers for orchid diversity? *Philos. Trans. R. Soc. Lond.*  
582 *B. Biol. Sci.* 359, 1523–35. doi:10.1098/rstb.2004.1529
- 583 Gustafsson, A.L.S., Verola, C.F., Antonelli, A., 2010. Reassessing the temporal  
584 evolution of orchids with new fossils and a Bayesian relaxed clock, with  
585 implications for the diversification of the rare South American genus  
586 *Hoffmannseggella* (Orchidaceae: Epidendroideae). *BMC Evol. Biol.* 10, 177.  
587 doi:10.1186/1471-2148-10-177
- 588 Hijmans, R.J., 2016. raster: Geographic Data Analysis and Modeling.
- 589 Hijmans, R.J., Cameron, S.E., Parra, J.L., Jones, P.G., Jarvis, A., 2005. Very high  
590 resolution interpolated climate surfaces for global land areas. *Int. J. Climatol.* 25,  
591 1965–1978. doi:10.1002/joc.1276

- 592 Hoorn, C., Wesselingh, F.P., ter Steege, H., Bermudez, M.A., Mora, A., Sevink, J.,  
593 Sanmartin, I., Sanchez-Meseguer, A., Anderson, C.L., Figueiredo, J.P., Jaramillo,  
594 C., Riff, D., Negri, F.R., Hooghiemstra, H., Lundberg, J., Stadler, T., Sarkinen, T.,  
595 Antonelli, A., 2010. Amazonia through time: Andean uplift, climate change,  
596 landscape evolution, and biodiversity. *Sci.* 330, 927–931.  
597 doi:10.1126/science.1194585
- 598 IUCN, 2013. Guidelines for Using the IUCN Red List Categories and Criteria. Version  
599 10.1. Prepared by the Standards and Petitions Subcommittee. [WWW Document].  
600 URL <http://www.iucnredlist.org/documents/RedListGuidelines.pdf>
- 601 Jaramillo, C., Montes, C., Cardona, A., Silvestro, D., Antonelli, A., Bacon, C.D., 2017.  
602 Comment (1) on “Formation of the Isthmus of Panama” by O’Dea & al. *Sci. Adv.*  
603 3.
- 604 Jersáková, J., Johnson, S.D., Kindlmann, P., 2006. Mechanisms and evolution of  
605 deceptive pollination in orchids. *Biol. Rev.* 81, 219–235.  
606 doi:10.1017/S1464793105006986
- 607 Katoh, K., Standley, D.M., 2013. MAFFT multiple sequence alignment software  
608 version 7: Improvements in performance and usability. *Mol. Biol. Evol.* 30, 772–  
609 780. doi:10.1093/molbev/mst010
- 610 Lambert, S.M., Wiens, J.J., 2013. Evolution of viviparity: A phylogenetic test of the  
611 cold-climate hypothesis in phrynosomatid lizards. *Evol.* 67, 2614–2630.  
612 doi:10.1111/evo.12130
- 613 Landis, M.J., Matzke, N.J., Moore, B.R., Huelsenbeck, J.P., 2013. Bayesian analysis of  
614 biogeography when the number of areas is large. *Syst. Biol.* 62, 789–804.  
615 doi:10.1093/sysbio/syt040
- 616 Laube, S., Zotz, G., 2003. Which abiotic factors limit vegetative growth in a vascular  
617 epiphyte? *Funct. Ecol.* 17, 598–604. doi:10.1046/j.1365-2435.2003.00760.x
- 618 Martos, F., Johnson, S.D., Peter, C.I., Bytber, B., 2014. A molecular phylogeny  
619 reveals paraphyly of the large genus *Eulophia* (Orchidaceae): A case for the  
620 reinstatement of *Orthochilus*. *Taxon* 63, 9–23. doi:10.12705/631.6
- 621 Matzke, N.J., 2013. BioGeoBEARS: BioGeography with Bayesian (and Likelihood)  
622 Evolutionary Analysis in R Scripts.
- 623 McCormick, M.K., Jacquemyn, H., 2014. What constrains the distribution of orchid  
624 populations? *New Phytol.* 202, 392–400. doi:10.1111/nph.12639
- 625 Monteiro, S.H.N., Selbach-Schnadelbach, A., de Oliveira, R.P., van den Berg, C., 2010.  
626 Molecular Phylogenetics of *Galeandra* (Orchidaceae: Catasetinae) based on  
627 Plastid and Nuclear DNA Sequences. *Syst. Bot.* 35, 476–486.  
628 doi:10.1600/036364410792495944
- 629 Nilsson, L.A., 1998. Deep flowers for long tongues. *Trends Ecol. Evol.* 5347, 259–260.
- 630 O’Dea, A., Lessios, H.A., Coates, A.G., Eytan, R.I., Restrepo-moreno, S.A., Cione,  
631 A.L., Collins, L.S., Queiroz, A. De, Farris, D.W., Norris, R.D., Stallard, R.F.,  
632 Woodburne, M.O., Aguilera, O., Aubry, M., Berggren, W.A., Budd, A.F., Cozzuol,  
633 M.A., Coppard, S.E., Duque-caro, H., Finnegan, S., Gasparini, G.M., Grossman,  
634 E.L., Johnson, K.G., Keigwin, L.D., Knowlton, N., Leigh, E.G., Leonard-pingel,  
635 J.S., Marko, P.B., Pyenson, N.D., Rachello-dolmen, P.G., Soibelzon, E.,  
636 Soibelzon, L., Todd, J.A., Vermeij, G.J., Jackson, J.B.C., 2016. Formation of the  
637 Isthmus of Panama. *Sci. Adv.* 2, 1–12.
- 638 Oksanen, J., Kindt, R., Legendre, P., O’Hara, B., Stevens, H., 2007. The vegan package.  
639 *Community Ecol. Packag.* 10, 631–637.
- 640 Oliveira-Filho, A.T., Fontes, M.A.L., 2000. Patterns of floristic differentiation among  
641 Atlantic forests in southeastern Brazil and the influence of climate. *Biotropica* 32,

- 642 793–810.
- 643 Oliveira-Filho, A.T., Ratter, J.A., 1995. A study of the origin of central Brazilian forests  
644 by the analysis of plant species distribution patterns. *Edinburgh J. Bot.* 52, 141–  
645 194. doi:10.1017/S0960428600000949
- 646 Olmstead, R.G., 2013. Phylogeny and biogeography in Solanaceae, Verbenaceae and  
647 Bignoniaceae: A comparison of continental and intercontinental diversification  
648 patterns. *Bot. J. Linn. Soc.* 171, 80–102. doi:10.1111/j.1095-8339.2012.01306.x
- 649 Pansarin, E.R., Maciel, A.A., 2017. Evolution of pollination systems involving edible  
650 trichomes in orchids. *AoB Plants* 9, 1–13. doi:10.1093/aobpla/plx033
- 651 Pearson, D.L., Dressler, R.L., 1985. Two-year study of male orchid bee (Hymenoptera:  
652 Apidae: Euglossini) attraction to chemical baits in lowland south-eastern Perú. *J.*  
653 *Trop. Ecol.* 1, 37. doi:10.1017/S0266467400000067
- 654 Pennington, R.T., Lewis, G., Ratter, J.A., 2006. Neotropical savannas and dry forests:  
655 plant diversity, biogeography and conservation. CRC Press Florida.
- 656 Pérez-Escobar, O.A., Balbuena, J.A., Gottschling, M., 2016. Rumbling Orchids: How to  
657 Assess Divergent Evolution between Chloroplast Endosymbionts and the Nuclear  
658 Host. *Syst. Biol.* 65, 51–65. doi:10.1093/sysbio/syv070
- 659 Pérez-Escobar, O.A., Chomicki, G., Condamine, F.L., de Vos, J.M., Martins, A.C.,  
660 Smidt, E.C., Klitgård, B., Gerlach, G., Heinrichs, J., 2017a. Multiple Geographical  
661 Origins of Environmental Sex Determination enhanced the diversification of  
662 Darwin’s Favourite Orchids. *Sci. Rep.* 7, 12878. doi:10.1038/s41598-017-12300-y
- 663 Pérez-Escobar, O.A., Chomicki, G., Condamine, F.L., Karremans, A.P., Bogarín, D.,  
664 Matzke, N.J., Silvestro, D., Antonelli, A., 2017b. Recent origin of Neotropical  
665 orchids in the world’s richest plant biodiversity hotspot. *New Phytol.* 215, 891–  
666 905.
- 667 Pérez-Escobar, O.A., Gottschling, M., Chomicki, G., Condamine, F.L., Klitgård, B.,  
668 Pansarin, E.R., Gerlach, G., 2017c. Andean mountain building did not preclude  
669 dispersal of lowland epiphytic orchids in the Neotropics. *Sci. Rep.* 7, 4919.  
670 doi:<http://dx.doi.org/10.1101/106393>
- 671 Pérez-Escobar, O.A., Gottschling, M., Whitten, W.M., Salazar, G., Gerlach, G., 2015.  
672 Sex and the Catasetinae (Darwin’s favourite orchids). *Mol. Phylogenet. Evol.* 97,  
673 1–10. doi:10.1016/j.ympev.2015.11.019
- 674 Posadas, P., Ortiz-Jaureguizar, E., 2016. Evolução da região andina da América do Sul,  
675 in: Carvalho, C.J.B., Almeida, E.A.B. (Eds.), *Biogeografia Da América Do Sul:*  
676 *Análise de Tempo, Espaço E Forma.* Editora Roca.
- 677 Rambaut, A., 2009. FigTree: Tree figure drawing tool.
- 678 Ramírez, S.R., Eltz, T., Fujiwara, M.K., Gerlach, G., Goldman-Huertas, B., Tsutsui,  
679 N.D., Pierce, N.E., 2011. Asynchronous diversification in a specialized plant-  
680 pollinator mutualism. *Sci.* 333, 1742–1746. doi:10.1126/science.1209175
- 681 Ramírez, S.R., Gravendeel, B., Singer, R.B., Marshall, C.R., Pierce, N.E., 2007. Dating  
682 the origin of the Orchidaceae from a fossil orchid with its pollinator. *Nature* 448,  
683 1042–5. doi:10.1038/nature06039
- 684 Ree, R.H., Smith, S.A., 2008. Maximum likelihood inference of geographic range  
685 evolution by dispersal, local extinction, and cladogenesis. *Syst. Biol.* 57, 4–14.  
686 doi:10.1080/10635150701883881
- 687 Renner, S., 2004. Plant dispersal across the tropical atlantic by wind and sea currents.  
688 *Int. J. Plant Sci.* 165, S23–S33. doi:10.1086/383334
- 689 Revell, L.J., 2013. Ancestral character estimation under the threshold model from  
690 quantitative genetics. *Evol.* 68, 743–759. doi:10.1111/evo.12300
- 691 Revell, L.J., 2012. phytools: An R package for phylogenetic comparative biology (and

- 692 other things). *Methods Ecol. Evol.* 3, 217–223. doi:10.1111/j.2041-  
693 210X.2011.00169.x
- 694 Romero-Gonzalez, G.A., Warford, N., 1995. Three new *Galeandra* (Orchidaceae:  
695 Cyrtopodiniinae). *Lindleyana* 10, 75–91.
- 696 Ronquist, F., 1997. Dispersal-vicariance analysis: a new approach to the quantification  
697 of historical biogeography. *Syst. Biol.* 46, 195. doi:10.2307/2413643
- 698 Schuettpelz, E., Pryer, K.M., 2009. Evidence for a Cenozoic radiation of ferns in an  
699 angiosperm-dominated canopy. *Proc. Natl. Acad. Sci.* 106, 11200–11205.  
700 doi:10.1073/pnas.0811136106
- 701 Silvestro, D., Michalak, I., 2012. raxmlGUI: a graphical front-end for RAxML. *Org.*  
702 *Divers. Evol.* 12, 335–337. doi:DOI: 10.1007/s13127-011-0056-0
- 703 Simon, M.F., Grether, R., de Queiroz, L.P., Skema, C., Pennington, R.T., Hughes, C.E.,  
704 2009. Recent assembly of the Cerrado, a neotropical plant diversity hotspot, by in  
705 situ evolution of adaptations to fire. *Proc. Natl. Acad. Sci.* 106, 20359–20364.  
706 doi:10.1073/pnas.0903410106
- 707 Sosa, V., Cameron, K.M., Angulo, D.F., Hernández-Hernández, T., 2016. Life form  
708 evolution in epidendroid orchids: ecological consequences of the shift from  
709 epiphytism to terrestrial habit in *Hexalectris*. *Taxon* 65, 235–248.  
710 doi:10.12705/652.2
- 711 Stamatakis, A., 2006. RAxML-VI-HPC: maximum likelihood-based phylogenetic  
712 analyses with thousands of taxa and mixed models. *Bioinformatics* 22, 2688–90.  
713 doi:10.1093/bioinformatics/btl446
- 714 Steiner, K.E., Whitehead, V.B., 1990. Pollinator adaptation to oil-secreting flowers -  
715 *Rediviva* and *Diascia*. *Evol.* 44, 1701–1707.
- 716 Werneck, F.P., 2011. The diversification of eastern South American open vegetation  
717 biomes: Historical biogeography and perspectives. *Quat. Sci. Rev.* 30, 1630–1648.  
718 doi:10.1016/j.quascirev.2011.03.009
- 719 Whittall, J.B., Hodges, S.A., 2007. Pollinator shifts drive increasingly long nectar spurs  
720 in columbine flowers. *Nature* 447, 706–9. doi:10.1038/nature05857
- 721 Wright, S., 1934. An analysis of variability in the number of digits in an inbred strain of  
722 guinea pigs. *Genetics* 19, 506–536.
- 723 Xiang, X.G., Jin, W.T., Li, D.Z., Schuiteman, A., Huang, W.C., Li, J.W., Jin, X.H., Li,  
724 Z.Y., 2014. Phylogenetics of tribe Collabieae (Orchidaceae, Epidendroideae) based  
725 on four chloroplast genes with morphological appraisal. *PLoS One* 9.  
726 doi:10.1371/journal.pone.0087625
- 727 Xiang, X.G., Mi, X.C., Zhou, H.L., Li, J.W., Chung, S.W., Li, D.Z., Huang, W.C., Jin,  
728 W.T., Li, Z.Y., Huang, L.Q., Jin, X.H., 2016. Biogeographical diversification of  
729 mainland Asian *Dendrobium* (Orchidaceae) and its implications for the historical  
730 dynamics of evergreen broad-leaved forests. *J. Biogeogr.* 43, 1310–1323.  
731 doi:10.1111/jbi.12726
- 732 Zachos, J., Pagani, M., Sloan, L., Thomas, E., Billups, K., 2001. Trends, Global  
733 Rhythms, Aberrations in Global Climate 65Ma to Present. *Sci.* 292, 686–693.  
734 doi:10.1126/science.1059412
- 735 Zhang, G.-Q., Liu, K.-W., Li, Z., Lohaus, R., Hsiao, Y.-Y., Niu, S.-C., Wang, J.-Y.,  
736 Lin, Y.-C., Xu, Q., Chen, L.-J., Yoshida, K., Fujiwara, S., Wang, Z.-W., Zhang,  
737 Y.-Q., Mitsuda, N., Wang, M., Liu, G.-H., Pecoraro, L., Huang, H.-X., Xiao, X.-J.,  
738 Lin, M., Wu, X.-Y., Wu, W.-L., Chen, Y.-Y., Chang, S.-B., Sakamoto, S., Ohme-  
739 Takagi, M., Yagi, M., Zeng, S.-J., Shen, C.-Y., Yeh, C.-M., Luo, Y.-B., Tsai, W.-  
740 C., Van de Peer, Y., Liu, Z.-J., 2017. The *Apostasia* genome and the evolution of  
741 orchids. *Nature* 549, 379.

- 742 Zhang, Z., Yan, Y., Tian, Y., Li, J., He, J.S., Tang, Z., 2015. Distribution and  
743 conservation of orchid species richness in China. *Biol. Conserv.* 181, 64–72.  
744 doi:10.1016/j.biocon.2014.10.026  
745 Zhang, Dai, Y., Hao, G.-Y., Li, J.-W., Fu, X.-W., Zhang, J.-L., 2015. Differentiation of  
746 water-related traits in terrestrial and epiphytic *Cymbidium* species. *Front. Plant Sci.*  
747 6, 1–10. doi:10.3389/fpls.2015.00260  
748 Zotz, G., 2013. The systematic distribution of vascular epiphytes – a critical update.  
749 *Bot. J. Linn. So* 171, 453–481.  
750  
751  
752  
753  
754  
755  
756

757

## 758 **Figure legends**

759

760 **Fig. 1.** Time-calibrated phylogeny and biogeographic results, showing area coding, and  
761 distribution map. Pie charts on nodes represents ancestral area resulted from the  
762 BioGeoBEARS analysis and color code follows the legend on the map: A = Central  
763 America, B = Choco, C = Amazonia, D = Guiana Shield, E = Dry Diagonal and F =  
764 Atlantic Forest. Grey bars represent 95% highest posterior density interval for age  
765 estimates. Colored circles on tips represent the occurrence of that species in the  
766 delimited geographical areas. *Galeandra macroleptera* presents a grey circle, because it  
767 was excluded from the BioGeoBEARS analysis because of negative branch lengths.  
768 Photographs in circles represent floral morphological variation in the genus. Colors  
769 encircling orchid pictures represent the distribution range of the species according to  
770 delimited areas on the map. Photo credits: Adarilda Petini-Benelli (*G. stangeana*, *G.*  
771 *blanchetii*), Günter Gerlach (*G. devoniana*), Silvana H. N. Monteiro (*G. cristata*, *G.*  
772 *montana*).

773

774 **Fig. 2.** Spur length evolution in *Galeandra* species. A. Ancestral state estimation of spur  
775 length in *Galeandra* species; B. Phenogram showing spur length evolution in time.

776

777 **Fig. 4.** Phylomorphospace analysis result, considering simultaneously spur length and  
778 range size as continuous variables, and phylogenetic relationships. Each dot in the  
779 graphics represent one *Galeandra* species and the colours distinguish them by habit,  
780 terrestrial (yellow) and epiphytic (green). X and Y axes represent respectively, range size  
781 (in km<sup>2</sup>) and floral spur length (in cm).

782

## 783 **Online Supplementary materials**

784

785 **Fig. S1.** Measurements of *Galeandra* floral spur shown in *G. santarenesis* flower. A.  
786 spur width, B. spur length (illustration by A. E. Rocha)

787 **Fig. S2.** Maximum likelihood phylogeny for the matrix of 31 taxa and 6014 nucleotides  
788 for *Galeandra* and outgroups, analysed in RaxML. Values above branches show the ML  
789 bootstrap for 1000 replicates.

790 **Fig. S3.** Time-calibrated tree for the matrix of 31 taxa and 6014 nucleotides for  
791 *Galeandra* and outgroups analyzed in BEAST 1.8.3

792 **Fig. S4.** Traitgram for spur length evolution in time, showing uncertainty about  
793 character state using transparent probability density.

794 **Fig. S5.** Cluster dendrogram showing bioclimatic variables relatedness. Bioclimatic  
795 variables highlighted in yellow are non-correlated.

796 **Fig. S6.** Non-metric multidimensional scaling results: epiphytic x terrestrial species.

797 **Fig. S7.** Non-metric multidimensional scaling results: small x long spurred species.

798

799 **Table S1.** List of species used in this study with voucher information and GenBank  
800 accession numbers. Newly generated sequences are written in bold. Herbarium  
801 acronyms followed the *Index Hebariorum* <http://sweetgum.nybg.org/science/ih/>

802 **Table S2.** Botanical collections revised for geographical distribution data of *Galeandra*.  
803 Herbarium acronyms followed the *Index Hebariorum*  
804 <http://sweetgum.nybg.org/science/ih/>

805 **Table S3.** Statistical results from BioGeoBEARS multimodel approach. In bold the  
806 best-fit model.

807 **Table S4.** *Galeandra* species and their Area of Occupancy (AOO) and Extent of  
808 Occurrence (EEO), in square meters (km<sup>2</sup>) calculated in GeoCAT (Bachman et al.  
809 2011; <http://geocat.kew.org>)

810 **Table S5.** Measurements of floral spur length and width. Herbarium acronyms followed  
811 the *Index Hebariorum* <http://sweetgum.nybg.org/science/ih/>.

812





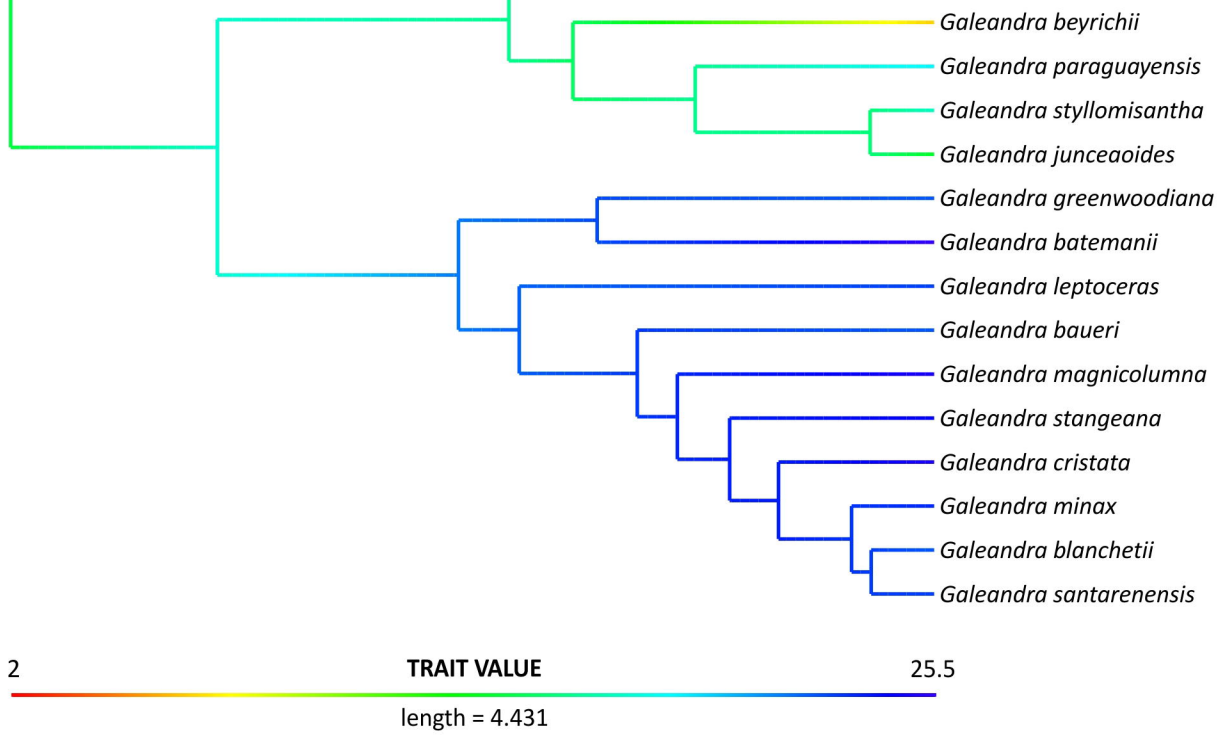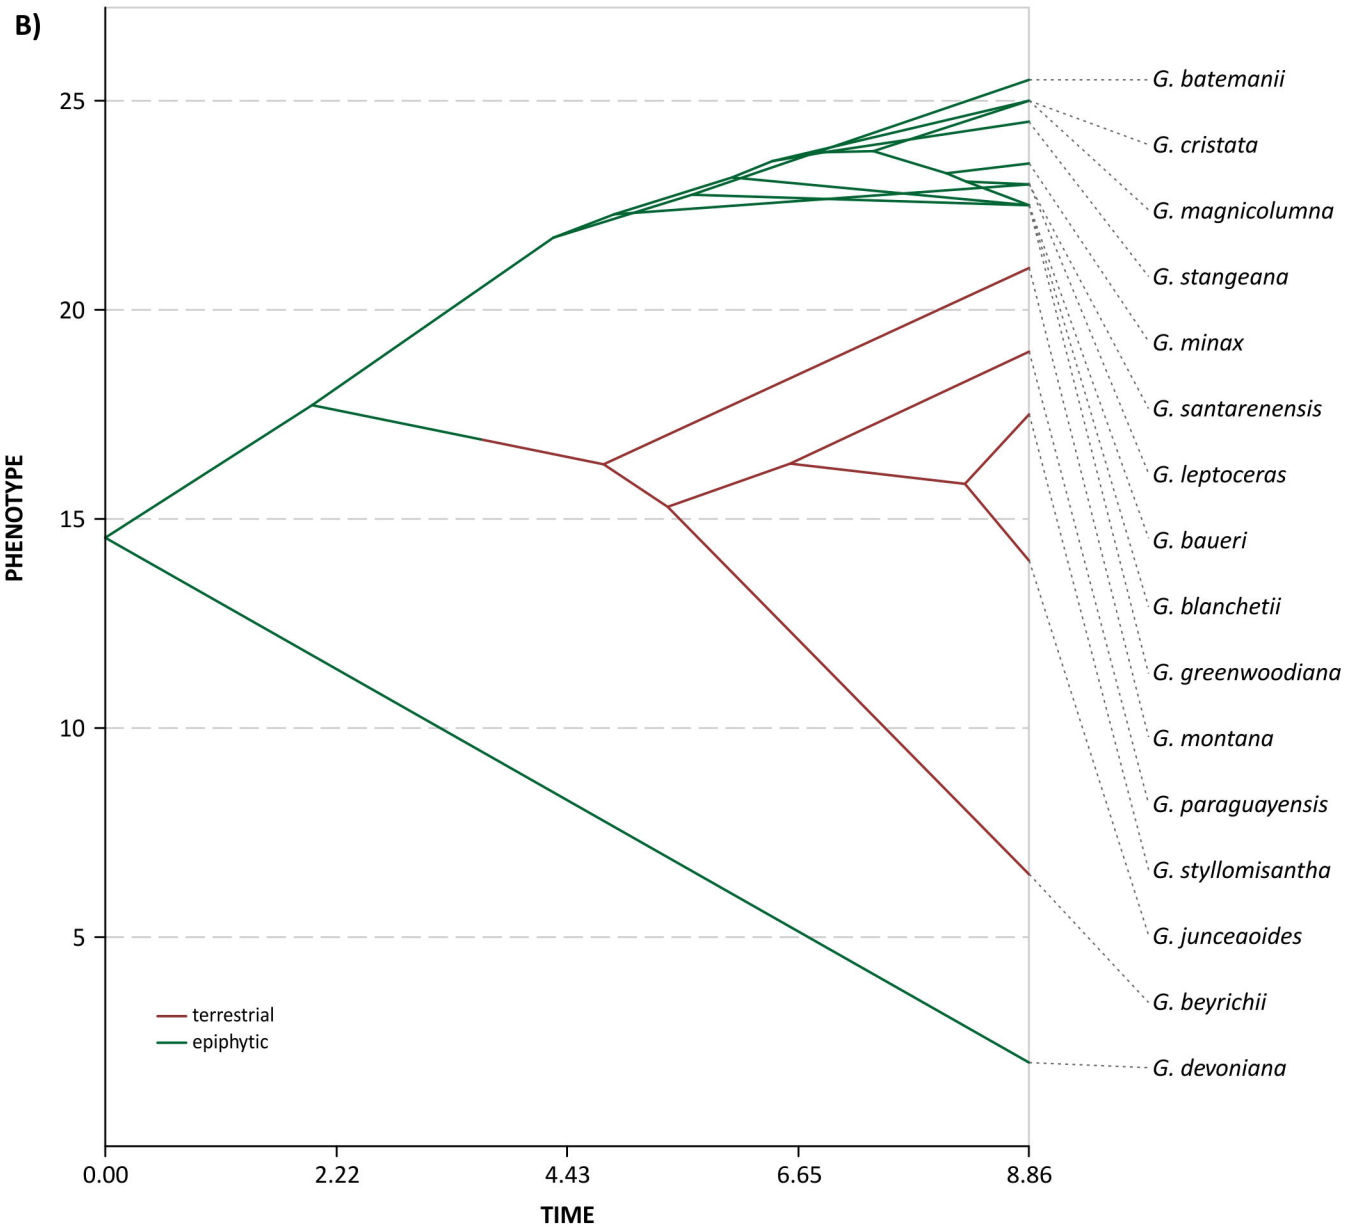

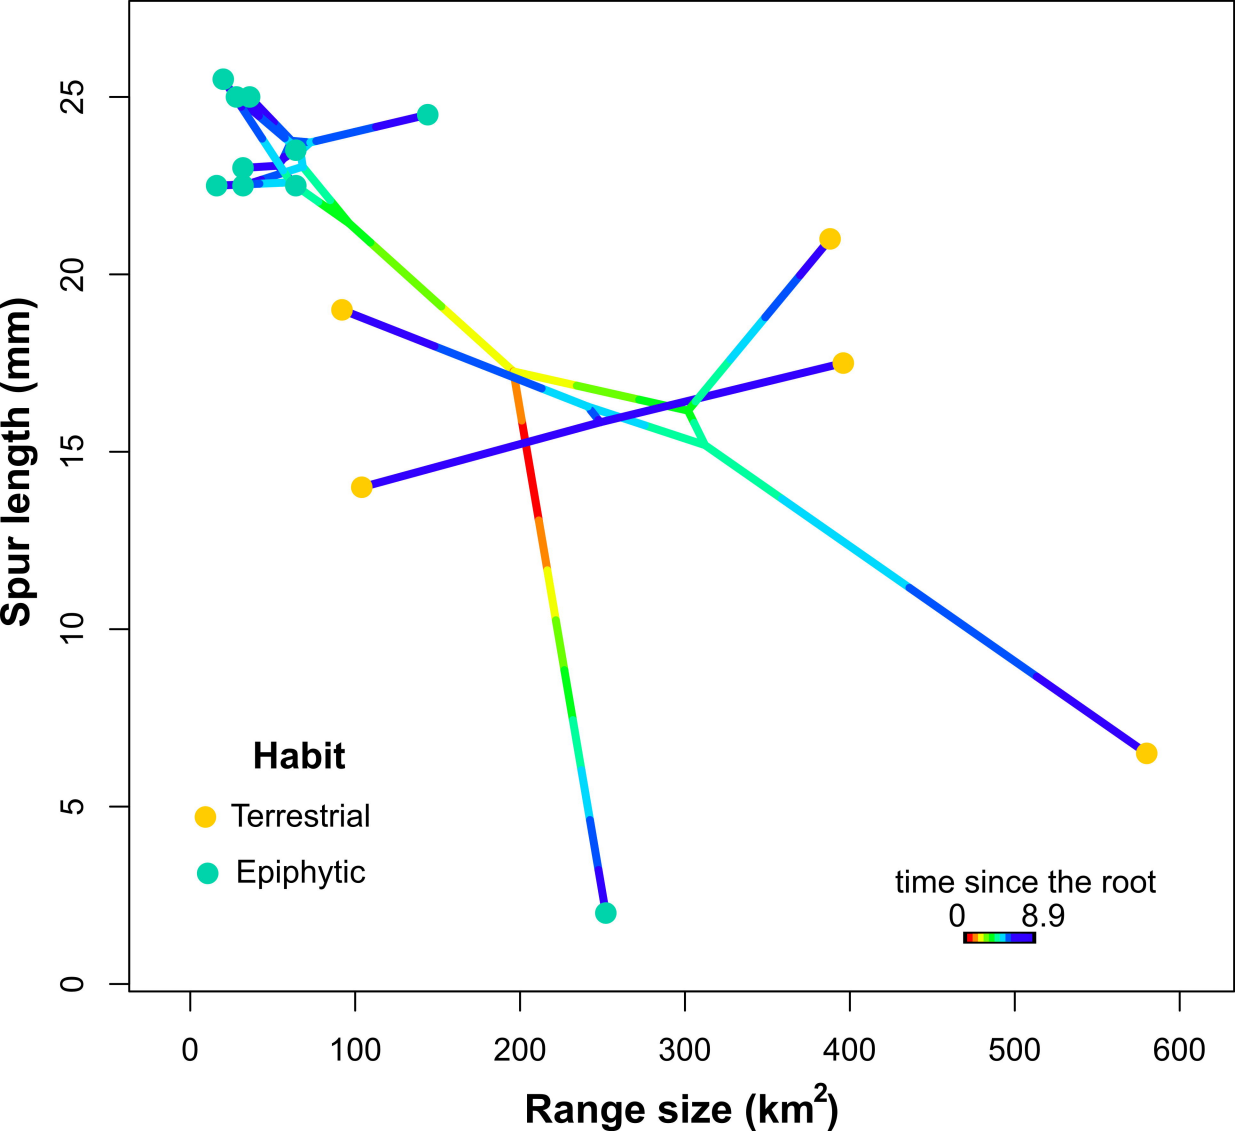

Source: https://www.biorxiv.org/content/10.1101/224709v1.full.pdf
